# Supplementary material for: Mechanical versus Bioprosthetic Aortic Valve Replacement in Patients Aged 50 to 70 Years
Source: PubMed Central journal article supplement — J Chest Surg. 2024 Mar 13;57(3):242–51. doi: 10.5090/jcs.23.143 (PMC11089054; doi:10.5090/jcs.23.143), 2024-03-13
Supplement: jcs-57-3-242-supple.pdf [file jcs-57-3-242-supple.pdf]

**Supplementary Table 1.** Operative profiles in the bioprosthetic AVR group: conventional versus sutureless/RD valve

| Variable                    | Conventional<br>bioprosthesis (n=492) | Sutureless/RD<br>valve (n=104) | p-value | SMD (%) |
|-----------------------------|---------------------------------------|--------------------------------|---------|---------|
| Minimally invasive approach | 83 (16.9)                             | 66 (63.5)                      | <0.001  | 108.0   |
| CPB time (min)              | 119.7±46.2                            | 88.4±32.5                      | <0.001  | 78.4    |
| ACC time (min)              | 78.4±30.4                             | 51.5±17.6                      | <0.001  | 108.3   |
| Concomitant procedure       |                                       |                                |         |         |
| CABG                        | 98 (19.9)                             | 15 (14.4)                      | 0.245   | 14.6    |
| Surgical AF ablation        | 20 (4.1)                              | 9 (8.7)                        | 0.084   | 18.9    |
| Ascending aorta replacement | 60 (12.2)                             | 6 (5.8)                        | 0.084   | 22.6    |
| Congenital correction       | 12 (2.4)                              | 3 (2.9)                        | 1.000   | 2.8     |

Values are presented as number (%) or mean±standard deviation unless otherwise indicated.

AVR, aortic valve replacement; RD, rapid-deployment; SMD, standardized mean difference; CPB, cardiopulmonary bypass; ACC, aortic cross-clamp; CABG, coronary artery bypass grafting; AF, atrial fibrillation.

**Supplementary Table 2.** Baseline characteristics according to prosthetic valve type in patients aged 50 to 65 years

| Variable                             | Original                  |                              |         |         | IPTW                      |                              |
|--------------------------------------|---------------------------|------------------------------|---------|---------|---------------------------|------------------------------|
|                                      | Mechanical AVR<br>(n=848) | Bioprosthetic<br>AVR (n=237) | p-value | SMD (%) | Mechanical AVR<br>(n=848) | Bioprosthetic<br>AVR (n=237) |
| <b>Baseline demographics</b>         |                           |                              |         |         |                           |                              |
| Age (yr)                             | 58.6±4.4                  | 61.7±3.4                     | <0.001  | 79.9    | 59.2±4.4                  | 59.6±4.2                     |
| Female                               | 328 (38.7)                | 88 (37.1)                    | 0.720   | 3.2     | 38.7                      | 43.1                         |
| Body mass index (kg/m <sup>2</sup> ) | 24.6±3.2                  | 24.2±3.2                     | 0.071   | 13.4    | 24.6±3.2                  | 24.2±3.3                     |
| <b>Baseline comorbidities</b>        |                           |                              |         |         |                           |                              |
| Hypertension                         | 411 (48.5)                | 126 (53.2)                   | 0.228   | 9.4     | 49.1                      | 46.2                         |
| Diabetes mellitus                    | 147 (17.3)                | 55 (23.2)                    | 0.050   | 14.6    | 17.8                      | 15.7                         |
| Dyslipidemia                         | 303 (35.7)                | 78 (32.9)                    | 0.467   | 5.9     | 35.8                      | 35.3                         |
| eGFR <30 mL/min/1.73 m <sup>2</sup>  | 19 (2.2)                  | 25 (10.5)                    | <0.001  | 34.5    | 3.3                       | 3.7                          |
| Dialysis                             | 14 (1.7)                  | 20 (8.4)                     | <0.001  | 31.4    | 2.1                       | 2.8                          |
| Stroke or TIA                        | 26 (3.1)                  | 11 (4.6)                     | 0.328   | 8.2     | 3.4                       | 3.1                          |
| Coronary artery disease              | 128 (15.1)                | 50 (21.1)                    | 0.035   | 15.6    | 16.2                      | 17.8                         |
| Previous PCI                         | 31 (3.7)                  | 13 (5.5)                     | 0.282   | 8.8     | 3.7                       | 3.1                          |
| Atrial fibrillation                  | 69 (8.1)                  | 17 (7.2)                     | 0.727   | 3.6     | 7.9                       | 5.7                          |
| Chronic lung disease                 | 103 (12.1)                | 28 (11.8)                    | 0.979   | 1.0     | 11.7                      | 9.1                          |
| NYHA fc III or IV                    | 167 (19.7)                | 41 (17.3)                    | 0.463   | 6.2     | 19.2                      | 15.4                         |
| Previous cardiac surgery             | 22 (2.6)                  | 4 (1.7)                      | 0.571   | 6.3     | 2.5                       | 3.6                          |
| Hemoglobin (g/dL)                    | 13.4±1.6                  | 12.9±1.8                     | <0.001  | 29.7    | 13.3±1.7                  | 13.1±1.6                     |
| AV pathology                         |                           |                              | 0.162   | 13.1    |                           |                              |
| Stenosis                             | 495 (58.4)                | 147 (62.0)                   |         |         | 59.3                      | 60.1                         |

(Continued on next page)

**Supplementary Table 2.** Continued

| Variable                     | Original                  |                              |         |         | IPTW                      |                              |
|------------------------------|---------------------------|------------------------------|---------|---------|---------------------------|------------------------------|
|                              | Mechanical AVR<br>(n=848) | Bioprosthetic<br>AVR (n=237) | p-value | SMD (%) | Mechanical AVR<br>(n=848) | Bioprosthetic<br>AVR (n=237) |
| Insufficiency                | 227 (26.8)                | 54 (22.8)                    |         |         | 26.1                      | 26.4                         |
| Steno-insufficiency          | 126 (14.9)                | 35 (14.8)                    |         |         | 14.6                      | 13.3                         |
| Echocardiographic data       |                           |                              |         |         |                           |                              |
| Bicuspid AV                  | 491 (57.9)                | 107 (45.1)                   | <0.001  | 25.7    | 55.4                      | 52.2                         |
| Rheumatic pathology          | 68 (8.0)                  | 17 (7.2)                     | 0.771   | 3.2     | 8.1                       | 8.4                          |
| LVEF (%)                     | 57.2±11.7                 | 57.7±12.2                    | 0.578   | 4.0     | 57.4±11.5                 | 58.4±11.0                    |
| LVEDD (mm)                   | 37.2±11.6                 | 35.5±10.8                    | 0.043   | 15.2    | 36.7±11.3                 | 35.8±11.1                    |
| LVEDD (mm)                   | 55.5±10.8                 | 54.3±9.9                     | 0.145   | 11.0    | 55.2±10.7                 | 54.6±10.3                    |
| LA diameter (mm)             | 41.6±7.4                  | 41.9±7.2                     | 0.675   | 3.1     | 41.6±7.3                  | 41.3±7.6                     |
| Peak RV-RA PG (mm Hg)        | 26.8±10.0                 | 26.4±10.2                    | 0.529   | 4.1     | 26.5±9.8                  | 26.2±10.4                    |
| Significant MR <sup>a)</sup> | 26 (3.1)                  | 13 (5.5)                     | 0.116   | 12.0    | 3.3                       | 3.0                          |
| Significant TR <sup>b)</sup> | 7 (0.8)                   | 5 (2.1)                      | 0.187   | 10.7    | 0.9                       | 0.9                          |

Values are presented as mean±standard deviation, number (%), or % unless otherwise indicated.

IPTW, inverse-probability-of-treatment weighting; AVR, aortic valve replacement; SMD, standardized mean difference; eGFR, estimated glomerular filtration rate; TIA, transient ischemic attack; PCI, percutaneous coronary intervention; NYHA fc, New York Heart Association functional class; AV, aortic valve; LVEF, left ventricle ejection fraction; LVESD, left ventricle end-systolic dimension; LVEDD, left ventricle end-diastolic dimension; LA, left atrium; RV, right ventricle; RA, right atrium; PG, pressure gradient; MR, mitral regurgitation; TR, tricuspid regurgitation.

<sup>a)</sup>Moderate to severe mitral regurgitation. <sup>b)</sup>Moderate to severe tricuspid regurgitation.

**Supplementary Table 3.** Operative profiles according to prosthetic valve type in AVR patients aged 50 to 65 years

| Variable                    | Original                  |                              |         | IPTW                      |                              |         |
|-----------------------------|---------------------------|------------------------------|---------|---------------------------|------------------------------|---------|
|                             | Mechanical AVR<br>(n=848) | Bioprosthetic<br>AVR (n=237) | p-value | Mechanical AVR<br>(n=848) | Bioprosthetic<br>AVR (n=237) | SMD (%) |
| Emergency or urgency        | 24 (2.9)                  | 5 (2.1)                      | 0.846   | 2.6                       | 1.2                          | 12.3    |
| Minimally invasive approach | 117 (13.8)                | 72 (30.4)                    | <0.001  | 17.4                      | 21.0                         | 9.1     |
| CPB time (min)              | 121.2±53.9                | 111.3±47.4                   | 0.010   | 121.2±53.3                | 113.2±50.5                   | 15.5    |
| ACC time (min)              | 76.5±32.7                 | 73.2±31.9                    | 0.168   | 76.4±31.9                 | 76.0±35.4                    | 1.3     |
| Concomitant procedure       |                           |                              |         |                           |                              |         |
| CABG                        | 107 (12.6)                | 45 (19.0)                    | 0.017   | 13.7                      | 13.5                         | 0.4     |
| Surgical AF ablation        | 27 (3.2)                  | 10 (4.2)                     | 0.566   | 3.3                       | 2.8                          | 3.3     |
| Ascending aorta replacement | 141 (16.6)                | 30 (12.7)                    | 0.167   | 15.7                      | 14.6                         | 3.2     |
| Congenital correction       | 22 (2.6)                  | 5 (2.1)                      | 0.851   | 2.6                       | 5.4                          | 14.6    |

Values are presented as number (%), %, or mean±standard deviation unless otherwise indicated.

AVR, aortic valve replacement; IPTW, inverse-probability-of-treatment weighting; SMD, standardized mean difference; CPB, cardiopulmonary bypass; ACC, aortic cross-clamp; CABG, coronary artery bypass grafting; AF, atrial fibrillation.

**Supplementary Table 4.** Clinical outcomes of mechanical versus bioprosthetic AVR groups in patients aged 50 to 65 years

| Outcomes <sup>a)</sup>           | Original               |                           |                   |         | IPTW                   |                           |                       |         |
|----------------------------------|------------------------|---------------------------|-------------------|---------|------------------------|---------------------------|-----------------------|---------|
|                                  | No. of events (rate)   |                           | OR or HR (95% CI) | p-value | No. of events (rate)   |                           | OR or HR/sHR (95% CI) | p-value |
|                                  | Mechanical AVR (N=848) | Bioprosthetic AVR (N=237) |                   |         | Mechanical AVR (N=848) | Bioprosthetic AVR (N=237) |                       |         |
| Early outcomes, no. (%)          |                        |                           |                   |         |                        |                           |                       |         |
| Early death                      | 8 (0.9)                | 5 (2.1)                   | 2.26 (0.73–6.98)  | 0.155   | 0.9                    | 1.3                       | 1.38 (0.37–5.20)      | 0.633   |
| Bleeding requiring exploration   | 30 (3.5)               | 9 (3.8)                   | 1.08 (0.50–2.30)  | 0.849   | 3.8                    | 3.9                       | 1.03 (0.49–2.17)      | 0.941   |
| LCOS requiring MCS <sup>b)</sup> | 10 (1.2)               | 4 (1.7)                   | 1.44 (0.45–4.63)  | 0.542   | 1.2                    | 0.9                       | 0.76 (0.17–3.38)      | 0.721   |
| Stroke                           | 18 (2.1)               | 11 (4.6)                  | 2.24 (1.04–4.82)  | 0.038   | 2.0                    | 2.3                       | 1.12 (0.42–2.97)      | 0.821   |
| New onset dialysis               | 8 (0.9)                | 2 (0.8)                   | 0.89 (0.19–4.24)  | 0.887   | 1.0                    | 0.5                       | 0.47 (0.07–3.28)      | 0.450   |
| Sternal wound infection          | 10 (1.2)               | 3 (1.3)                   | 1.07 (0.29–3.94)  | 0.914   | 1.1                    | 1.5                       | 1.29 (0.37–4.44)      | 0.689   |
| Overall outcomes, no. (%/PY)     |                        |                           |                   |         |                        |                           |                       |         |
| All-cause death                  | 167 (1.7)              | 55 (3.1)                  | 2.11 (1.54–2.88)  | <0.001  | 1.8                    | 2.5                       | 1.58 (1.07–2.35)      | 0.022   |
| Stroke                           | 83 (1.2)               | 5 (0.3)                   | 0.28 (0.11–0.70)  | 0.006   | 1.1                    | 0.2                       | 0.13 (0.08–0.22)      | <0.001  |
| Anticoagulation-related bleeding | 101 (1.4)              | 8 (0.5)                   | 0.37 (0.18–0.77)  | 0.007   | 1.4                    | 0.4                       | 0.13 (0.09–0.20)      | <0.001  |
| Operated valve endocarditis      | 17 (0.2)               | 4 (0.3)                   | 1.14 (0.38–3.43)  | 0.814   | 0.3                    | 0.3                       | 1.12 (0.43–2.90)      | 0.817   |
| AV reintervention                | 38 (0.5)               | 15 (1.0)                  | 2.62 (1.42–4.82)  | 0.002   | 0.5                    | 0.8                       | 3.54 (1.81–6.92)      | <0.001  |
| Readmission due to cardiac cause | 216 (3.4)              | 42 (3.2)                  | 0.91 (0.65–1.26)  | 0.564   | 3.4                    | 2.7                       | 1.19 (0.71–1.99)      | 0.515   |

Values are presented as number (%) or number (% per patient-year) unless otherwise indicated.

Early outcomes are presented as ORs. Overall outcomes are presented as HRs or sub-distributional HRs.

AVR, aortic valve replacement; IPTW, inverse-probability-of-treatment weighting; OR, odds ratio; HR, hazard ratio; CI, confidence interval; sHR, sub-distributional hazard ratio; LCOS, low cardiac output syndrome; MCS, mechanical circulatory support; PY, patient-year; AV, aortic valve.

<sup>a)</sup>Outcomes captured using the primary diagnosis during a visit to the emergency department or using any primary or secondary diagnosis during hospitalization. <sup>b)</sup> Included extracorporeal membrane oxygenation, intra-aortic balloon pump, and ventricular assist device.

**Supplementary Table 5.** Baseline characteristics according to prosthetic valve type in patients without concomitant CABG

| Variable                             | Original                  |                              |         | IPTW    |                           |                              |         |
|--------------------------------------|---------------------------|------------------------------|---------|---------|---------------------------|------------------------------|---------|
|                                      | Mechanical AVR<br>(n=849) | Bioprosthetic<br>AVR (n=483) | p-value | SMD (%) | Mechanical AVR<br>(n=849) | Bioprosthetic<br>AVR (n=483) | SMD (%) |
| <b>Baseline demographics</b>         |                           |                              |         |         |                           |                              |         |
| Age (yr)                             | 59.6±5.2                  | 65.4±4.1                     | <0.001  | 125.4   | 61.4±5.4                  | 62.2±5.4                     | 13.6    |
| Female                               | 332 (39.1)                | 191 (39.5)                   | 0.921   | 0.9     | 39.0                      | 40.2                         | 2.6     |
| Body mass index (kg/m <sup>2</sup> ) | 24.6±3.2                  | 24.5±3.3                     | 0.839   | 1.2     | 24.5±3.1                  | 24.4±3.3                     | 5.0     |
| <b>Baseline comorbidities</b>        |                           |                              |         |         |                           |                              |         |
| Hypertension                         | 412 (48.5)                | 259 (53.6)                   | 0.083   | 10.2    | 50.8                      | 49.7                         | 2.3     |
| Diabetes mellitus                    | 130 (15.3)                | 105 (21.7)                   | 0.004   | 16.6    | 16.8                      | 15.8                         | 2.6     |
| Dyslipidemia                         | 280 (33.0)                | 184 (38.1)                   | 0.068   | 10.7    | 34.3                      | 35.1                         | 1.7     |
| eGFR <30 mL/min/1.73 m <sup>2</sup>  | 19 (2.2)                  | 27 (5.6)                     | 0.002   | 17.4    | 3.2                       | 3.2                          | <0.1    |
| Dialysis                             | 15 (1.8)                  | 23 (4.8)                     | 0.003   | 16.9    | 2.5                       | 2.7                          | 1.3     |
| Stroke or TIA                        | 28 (3.3)                  | 26 (5.4)                     | 0.087   | 10.2    | 4.1                       | 3.7                          | 1.8     |
| Coronary artery disease              | 47 (5.5)                  | 51 (10.6)                    | 0.001   | 18.5    | 6.9                       | 8.7                          | 6.9     |
| Previous PCI                         | 19 (2.2)                  | 20 (4.1)                     | 0.070   | 10.8    | 2.4                       | 2.6                          | 1.5     |
| Atrial fibrillation                  | 78 (9.2)                  | 45 (9.3)                     | 1.000   | 0.4     | 8.9                       | 8.2                          | 2.4     |
| Chronic lung disease                 | 113 (13.3)                | 55 (11.4)                    | 0.352   | 5.8     | 13.8                      | 11.9                         | 5.6     |
| NYHA fc III or IV                    | 168 (19.8)                | 92 (19.0)                    | 0.798   | 1.9     | 19.8                      | 17.5                         | 5.8     |
| Previous cardiac surgery             | 22 (2.6)                  | 6 (1.2)                      | 0.147   | 9.9     | 2.1                       | 1.5                          | 4.1     |
| Hemoglobin (g/dL)                    | 13.4±1.6                  | 12.9±1.7                     | <0.001  | 30.9    | 13.3±1.7                  | 13.1±1.6                     | 9.1     |
| AV pathology                         |                           |                              | 0.002   | 20.1    |                           |                              | 2.1     |
| Stenosis                             | 502 (59.1)                | 299 (61.9)                   |         |         | 60.5                      | 61.4                         |         |

(Continued on next page)

**Supplementary Table 5.** Continued

| Variable                     | Original                  |                              |         | IPTW    |                           |                              |         |
|------------------------------|---------------------------|------------------------------|---------|---------|---------------------------|------------------------------|---------|
|                              | Mechanical AVR<br>(n=849) | Bioprosthetic<br>AVR (n=483) | p-value | SMD (%) | Mechanical AVR<br>(n=849) | Bioprosthetic<br>AVR (n=483) | SMD (%) |
| Insufficiency                | 224 (26.4)                | 91 (18.8)                    |         |         | 24.6                      | 24.3                         |         |
| Steno-insufficiency          | 123 (14.5)                | 93 (19.3)                    |         |         | 14.9                      | 14.3                         |         |
| Echocardiographic data       |                           |                              |         |         |                           |                              |         |
| Bicuspid AV                  | 505 (59.4)                | 232 (48.0)                   | <0.001  | 22.9    | 56.1                      | 54.0                         | 4.2     |
| Rheumatic pathology          | 68 (8.0)                  | 40 (8.3)                     | 0.939   | 1.0     | 8.1                       | 7.9                          | 0.6     |
| LVEF (%)                     | 57.5±11.6                 | 58.1±11.7                    | 0.341   | 5.4     | 57.9±11.3                 | 58.4±11.1                    | 4.8     |
| LVESD (mm)                   | 36.9±11.5                 | 35.4±10.7                    | 0.015   | 14.0    | 36.2±11.2                 | 35.4±10.8                    | 6.8     |
| LVEDD (mm)                   | 55.2±10.7                 | 53.8±9.5                     | 0.021   | 13.4    | 54.7±10.3                 | 54.1±10.1                    | 5.4     |
| LA diameter (mm)             | 41.7±7.4                  | 41.9±7.2                     | 0.626   | 2.8     | 41.7±7.3                  | 41.2±7.5                     | 7.1     |
| Peak RV-RA PG (mm Hg)        | 26.9±9.7                  | 27.0±9.3                     | 0.816   | 1.3     | 26.7±9.6                  | 26.4±9.4                     | 3.9     |
| Significant MR <sup>a)</sup> | 27 (3.2)                  | 18 (3.7)                     | 0.709   | 3.0     | 3.5                       | 3.1                          | 2.5     |
| Significant TR <sup>b)</sup> | 6 (0.7)                   | 7 (1.4)                      | 0.300   | 7.2     | 0.7                       | 0.8                          | 1.0     |

Values are presented as mean±standard deviation, number (%), or % unless otherwise indicated.

CABG, coronary artery bypass grafting; AVR, aortic valve replacement; IPTW, inverse-probability-of-treatment weighting; SMD, standardized mean difference; eGFR, estimated glomerular filtration rate; TIA, transient ischemic attack; PCI, percutaneous coronary intervention; NYHA fc, New York Heart Association functional class; AV, aortic valve; LVEF, left ventricle ejection fraction; LVESD, left ventricle end-systolic dimension; LVEDD, left ventricle end-diastolic dimension; LA, left atrium; RV, right ventricle; RA, right atrium; PG, pressure gradient; MR, mitral regurgitation; TR, tricuspid regurgitation.

<sup>a)</sup>Moderate to severe mitral regurgitation. <sup>b)</sup>Moderate to severe tricuspid regurgitation.

**Supplementary Table 6.** Operative profiles according to prosthetic valve type in patients without concomitant CABG

| Variable                    | Original                  |                              |         | IPTW    |                           |                              |         |
|-----------------------------|---------------------------|------------------------------|---------|---------|---------------------------|------------------------------|---------|
|                             | Mechanical AVR<br>(n=849) | Bioprosthetic<br>AVR (n=483) | p-value | SMD (%) | Mechanical AVR<br>(n=849) | Bioprosthetic<br>AVR (n=483) | SMD (%) |
| Emergency or urgency        | 26 (3.1)                  | 10 (2.0)                     | 0.260   | 9.6     | 2.6                       | 1.6                          | 7.4     |
| Minimally invasive approach | 129 (15.2)                | 148 (30.6)                   | <0.001  | 37.4    | 21.0                      | 27.2                         | 14.4    |
| CPB time (min)              | 116.5±48.7                | 107.5±40.6                   | 0.001   | 20.0    | 116.4±47.7                | 108.7±41.8                   | 17.2    |
| ACC time (min)              | 74.3±31.0                 | 70.5±27.8                    | 0.026   | 12.9    | 74.5±31.0                 | 72.8±29.6                    | 5.6     |
| Concomitant procedure       |                           |                              |         |         |                           |                              |         |
| Surgical AF ablation        | 34 (4.0)                  | 28 (5.8)                     | 0.175   | 8.3     | 4.6                       | 5.0                          | 1.8     |
| Ascending aorta replacement | 135 (15.9)                | 55 (11.4)                    | 0.029   | 13.2    | 14.0                      | 13.2                         | 2.4     |
| Congenital correction       | 21 (2.5)                  | 14 (2.9)                     | 0.773   | 2.6     | 3.0                       | 4.5                          | 7.9     |

Values are presented as number (%), %, or mean±standard deviation unless otherwise indicated.

CABG, coronary artery bypass grafting; IPTW, inverse-probability-of-treatment weighting; AVR, aortic valve replacement; SMD, standardized mean difference; CPB, cardiopulmonary bypass; ACC, aortic cross-clamp; AF, atrial fibrillation.



**Supplementary Table 7.** Clinical outcomes of mechanical versus bioprosthetic AVR groups in patients without concomitant CABG

| Outcomes <sup>a)</sup>           | Original               |                           |                   |         | IPTW                   |                           |                       |         |
|----------------------------------|------------------------|---------------------------|-------------------|---------|------------------------|---------------------------|-----------------------|---------|
|                                  | No. of events (rate)   |                           | OR or HR (95% CI) | p-value | No. of events (rate)   |                           | OR or HR/sHR (95% CI) | p-value |
|                                  | Mechanical AVR (N=849) | Bioprosthetic AVR (N=483) |                   |         | Mechanical AVR (N=849) | Bioprosthetic AVR (N=483) |                       |         |
| Early outcomes, no. (%)          |                        |                           |                   |         |                        |                           |                       |         |
| Early death                      | 8 (0.9)                | 8 (1.7)                   | 1.77 (0.66–4.75)  | 0.256   | 0.8                    | 1.2                       | 1.69 (0.55–5.15)      | 0.356   |
| Bleeding requiring exploration   | 27 (3.2)               | 22 (4.6)                  | 1.45 (0.82–2.58)  | 0.202   | 3.4                    | 3.8                       | 1.15 (0.64–2.09)      | 0.639   |
| LCOS requiring MCS <sup>b)</sup> | 9 (1.1)                | 8 (1.7)                   | 1.57 (0.60–4.10)  | 0.355   | 0.9                    | 1.1                       | 1.28 (0.41–4.00)      | 0.665   |
| Stroke                           | 17 (2.0)               | 16 (3.3)                  | 1.68 (0.84–3.35)  | 0.143   | 2.0                    | 2.3                       | 1.17 (0.54–2.52)      | 0.695   |
| New onset dialysis               | 6 (0.7)                | 4 (0.8)                   | 1.17 (0.33–4.18)  | 0.805   | 0.9                    | 0.6                       | 0.59 (0.15–2.36)      | 0.456   |
| Sternal wound infection          | 8 (0.9)                | 5 (1.0)                   | 1.10 (0.36–3.38)  | 0.868   | 0.8                    | 1.1                       | 1.50 (0.47–4.79)      | 0.494   |
| Overall outcomes, no. (%/PY)     |                        |                           |                   |         |                        |                           |                       |         |
| All-cause death                  | 172 (1.8)              | 110 (2.9)                 | 1.92 (1.50–2.46)  | <0.001  | 2.1                    | 2.4                       | 1.26 (0.93–1.71)      | 0.139   |
| Stroke                           | 83 (1.2)               | 24 (0.8)                  | 0.66 (0.41–1.04)  | 0.070   | 1.3                    | 0.5                       | 0.42 (0.24–0.72)      | 0.002   |
| Anticoagulation-related bleeding | 92 (1.3)               | 20 (0.7)                  | 0.50 (0.31–0.82)  | 0.006   | 1.3                    | 0.5                       | 0.40 (0.24–0.67)      | <0.001  |
| Operated valve endocarditis      | 20 (0.3)               | 8 (0.3)                   | 0.90 (0.39–2.06)  | 0.808   | 0.3                    | 0.3                       | 1.00 (0.34–2.95)      | 0.999   |
| AV reintervention                | 39 (0.5)               | 23 (0.8)                  | 1.73 (1.02–2.94)  | 0.042   | 0.5                    | 0.7                       | 4.41 (2.09–9.28)      | <0.001  |
| Readmission due to cardiac cause | 215 (3.5)              | 80 (2.9)                  | 0.81 (0.63–1.05)  | 0.117   | 3.5                    | 2.5                       | 1.08 (0.67–1.75)      | 0.755   |

Values are presented as number (%) or number (% per patient-year) unless otherwise indicated. Early outcomes are presented as odds ratios.

Overall outcomes are presented as hazard ratios or sub-distributional hazard ratios.

AVR, aortic valve replacement; CABG, coronary artery bypass grafting; IPTW, inverse-probability-of-treatment weighting; OR, odds ratio; HR, hazard ratio; CI, confidence interval; sHR, sub-distributional hazard ratio; LCOS, low cardiac output syndrome; MCS, mechanical circulatory support; PY, patient-year; AV, aortic valve.

<sup>a)</sup>Outcomes captured using a primary diagnosis during a visit to the emergency department or using any primary or secondary diagnosis during hospitalization. <sup>b)</sup>Included extracorporeal membrane oxygenation, intra-aortic balloon pump, and ventricular assist device.

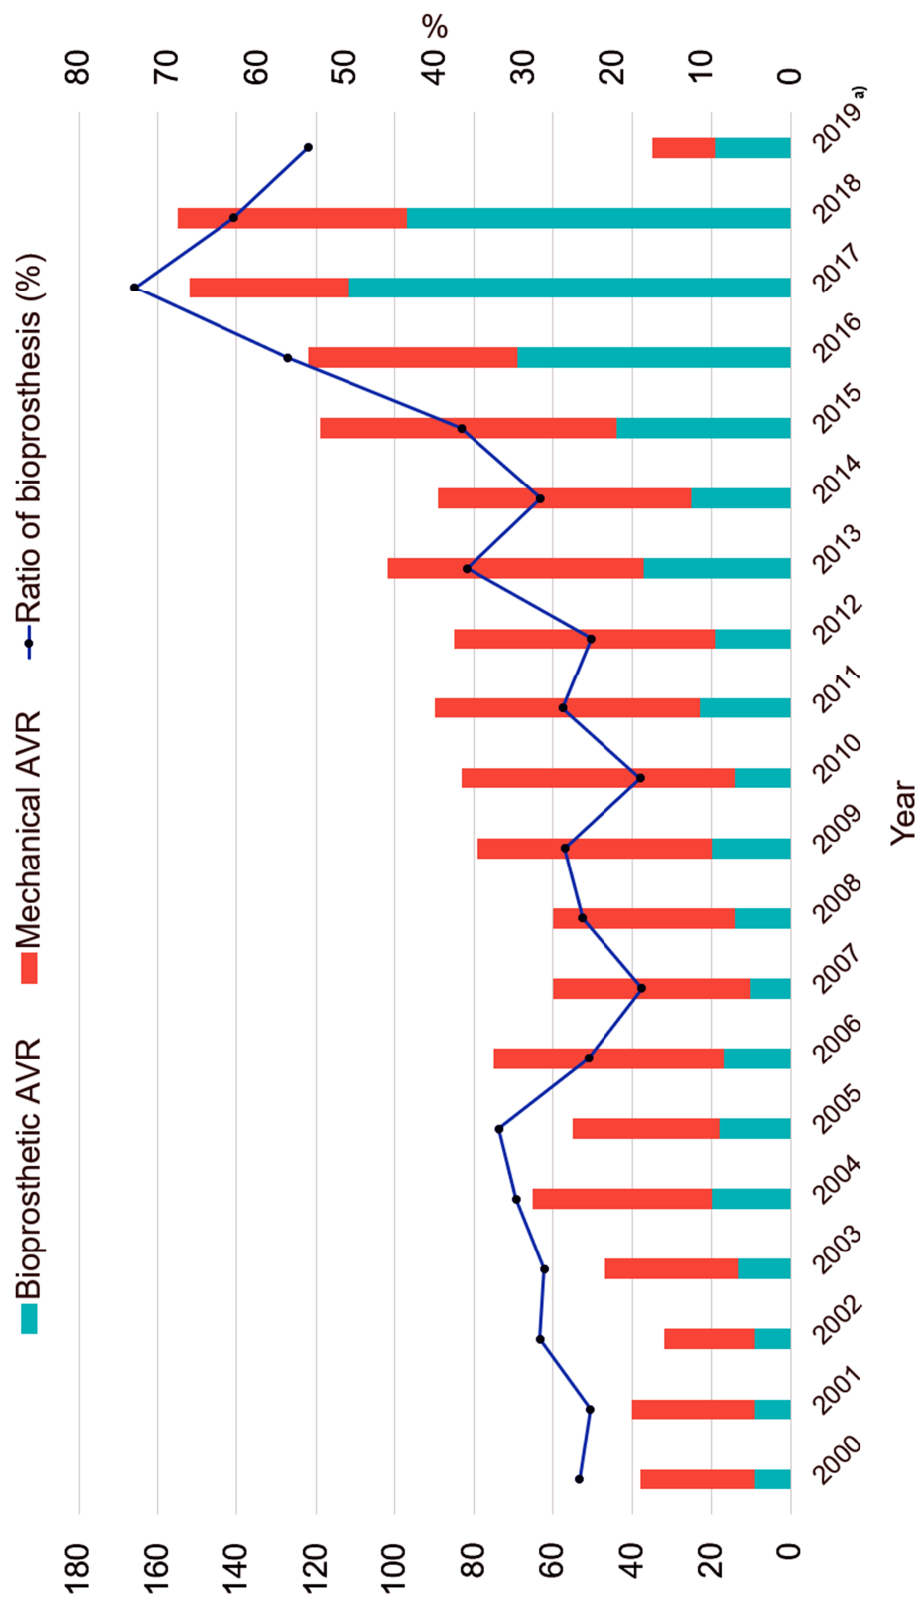

**Supplementary Fig. 1.** Number of isolated aortic valve replacements (AVRs) per year in patients aged 50 to 70 years. <sup>a)</sup>In 2019, results are reported up to March 31st.
